# Supplementary material for: The determinant of periodicity in Mycoplasma pneumoniae incidence: an insight from mathematical modelling
Source: PubMed Central journal article supplement (PMC4585982; doi:10.1038/srep14473), 2015-09-28
Supplement: srep14473-s1.pdf [file srep14473-s1.pdf]

1 **Supplementary information**

2 The determinant of periodicity in *Mycoplasma*  
3 *pneumoniae* incidence: an insight from mathematical  
4 modelling

5 Ryosuke Omori<sup>1</sup>, Yukihiro Nakata<sup>2</sup>, Heidi L. Tessmer<sup>1</sup>, Satowa Suzuki<sup>3</sup>, and Keigo  
6 Shibayama<sup>3</sup>

7 <sup>1</sup>*Division of Bioinformatics, Research Center for Zoonosis Control, Hokkaido*  
8 *University, Sapporo, Hokkaido, Japan*

9 <sup>2</sup>*Graduate School of Mathematical Sciences, The University of Tokyo, 3-8-1 Komaba*  
10 *Meguro-ku, Tokyo 153-8914, Japan*

11 <sup>3</sup>*Department of Bacteriology II, National Institute of Infectious Diseases, Tokyo, Japan*

12

# 1 Supplementary figures

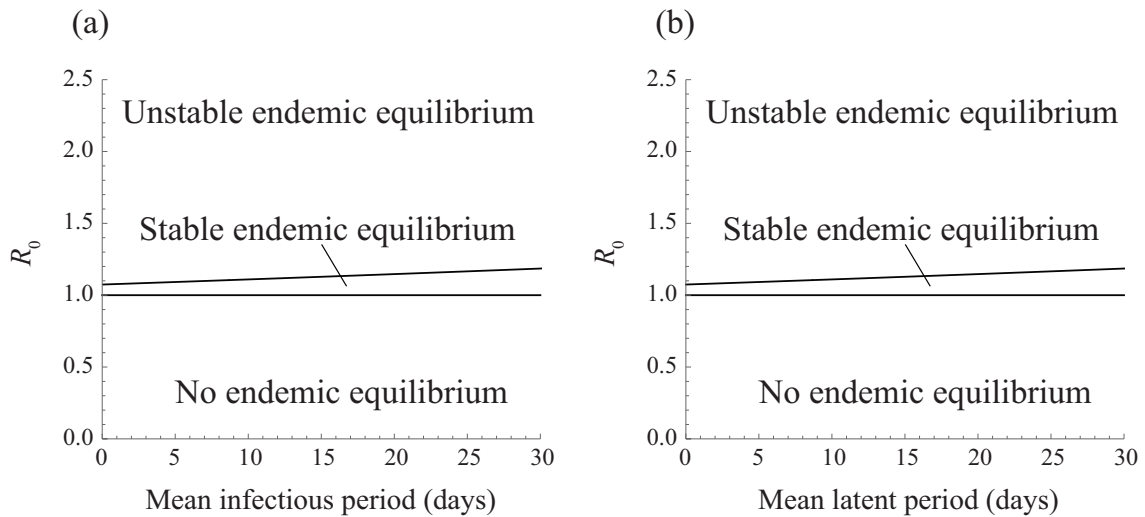

2

3 Figure S1: Oscillation in the long-term transmission dynamics of *MP* is not significantly  
4 sensitive to the length of the infectious period (a) or to the length of the latent period (b)  
5 if the basic reproduction number does not vary. Parameters are fixed as  $m_r = 4$  (years)  
6 in both figures and  $m_e = 21$  (days) in (a), while  $m_i = 21$  (days) in (b). The bottom line  
7 shows the boundary for the existence of endemic equilibrium and the upper line shows  
8 the boundary for the stability of endemic equilibrium.

9

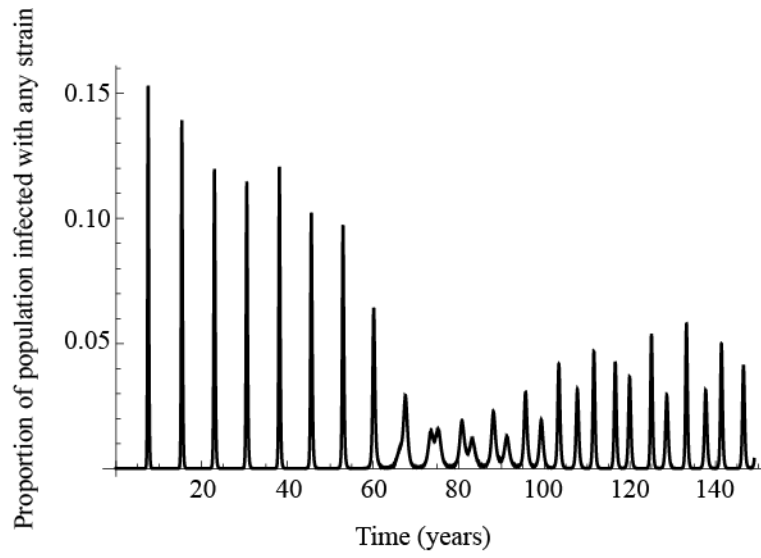

1

2 Figure S2: Change in epidemic cycle over time. No epidemiological interference was  
3 assumed and the parameters are set as  $m_r = 6$  years,  $\log_{10}[\sigma_r^2] = -0.60$ .

4

## 1 **Stability analysis of an SEIRS model**

2 Here we derive parametric expressions that are respectively plotted in Figures S1 (a)  
3 and (b) to determine stability boundaries in two-parameter planes, assuming a delta  
4 distribution for the waning immunity, i.e.  $G_r(\tau_r) = \delta_{m_r}(\tau_r)$ .

5 Since the demographic process is slow compared to the disease transmission dynamics,  
6 here we may assume  $\mu = 0$  to facilitate the mathematical analysis. The model (3) in the  
7 main text is written as

$$\begin{aligned} s'(t) &= -\beta s(t)i(t) + \frac{1}{m_i} i(t - m_r), \\ e'(t) &= \beta s(t)i(t) - \frac{1}{m_e} e(t), \\ i'(t) &= \frac{1}{m_e} e(t) - \frac{1}{m_i} i(t), \\ r'(t) &= \frac{1}{m_i} i(t) - \frac{1}{m_i} i(t - m_r). \end{aligned} \tag{S1}$$

8 First, let us compute the endemic equilibrium for (S1). The endemic equilibrium is  
9 denoted by  $(\bar{s}, \bar{e}, \bar{i}, \bar{r})$ . Then one can find that

$$\bar{s} = \frac{1}{\beta m_i}$$

10 and equalities  $\bar{e} = \frac{m_e}{m_i} \bar{i}$  and  $\bar{r} = \frac{m_r}{m_i} \bar{i}$ . Since  $\bar{s} + \bar{e} + \bar{i} + \bar{r} = 1$  holds (the total fraction is  
11 one), we get

$$\bar{i} = \frac{1 - \frac{1}{\beta m_i}}{1 + \frac{m_e}{m_i} + \frac{m_r}{m_i}}$$

12 Linearizing (S1) around the equilibrium, we can derive the characteristic equation, see  
13 e.g. [1] for detail. Let  $I$  be the  $3 \times 3$  identity matrix. The characteristic equation is

$$\det \left( \begin{pmatrix} -\beta \bar{i} & 0 & m_i^{-1} e^{-\lambda m_r} - m_i^{-1} \\ \beta \bar{i} & -m_e^{-1} & m_i^{-1} \\ 0 & m_e^{-1} & -m_i^{-1} \end{pmatrix} - \lambda I \right) = 0. \quad (\text{S2})$$

- 1 Below we use the notation  $i$  to denote the imaginary unit i.e.  $i = \sqrt{-1}$ , thus we write  $\Lambda$   
 2 for  $\beta \bar{i}$ . The equation (S2) is

$$\begin{aligned} \lambda^3 + (\Lambda + m_e^{-1} + m_i^{-1})\lambda^2 + \Lambda(m_e^{-1} + m_i^{-1})\lambda + \Lambda m_e^{-1} m_i^{-1} \\ = \Lambda m_e^{-1} m_i^{-1} e^{-\lambda m_r}. \end{aligned} \quad (\text{S3})$$

- 3 We now investigate a parameter set such that (S3) has purely imaginary roots to see if  
 4 the endemic equilibrium becomes unstable via Hopf bifurcation. Substituting  
 5  $\lambda = i\omega$ ,  $\omega > 0$  into (S3) we get the following two equations

$$-(\Lambda + m_e^{-1} + m_i^{-1})\omega^2 + \Lambda m_e^{-1} m_i^{-1} = \Lambda m_e^{-1} m_i^{-1} \cos(\omega m_r), \quad (\text{S4a})$$

$$-\omega^3 + \Lambda(m_e^{-1} + m_i^{-1})\omega = -\Lambda m_e^{-1} m_i^{-1} \sin(\omega m_r). \quad (\text{S4b})$$

- 6 From the first equation (S4a) we get

$$\Lambda = \frac{(m_e^{-1} + m_i^{-1})\omega^2}{m_e^{-1} m_i^{-1} \{1 - \cos(\omega m_r)\} - \omega^2}. \quad (\text{S5})$$

- 7 Plugging (S5) into the second equation (S4b) we get

$$\begin{aligned} 0 &= \{m_e^{-1} \sin(\omega m_r) + \omega\} m_i^{-2} \\ &+ m_e^{-1} [\omega \{1 + \cos(\omega m_r)\} + m_e^{-1} \sin(\omega m_r)] m_i^{-1} + \omega(\omega^2 + m_e^{-2}). \end{aligned} \quad (\text{S6})$$

- 8 From (S6) one has

$$\begin{aligned} 0 &= \omega(\omega^2 + m_e^{-2}) m_i^2 + \\ & m_e^{-1} [\omega \{1 + \cos(\omega m_r)\} + m_e^{-1} \sin(\omega m_r)] m_i + \{m_e^{-1} \sin(\omega m_r) + \omega\}. \end{aligned} \quad (\text{S7})$$

- 9 One can solve (S7) with respect to  $m_i$  as

$$m_i = m_i^*(\omega) := \frac{-m_e^{-1}[\omega\{1 + \cos(\omega m_r)\} + m_e^{-1}\sin(\omega m_r)] \pm \sqrt{D_e(\omega)}}{2\omega(\omega^2 + m_e^{-2})}, \quad (\text{S8})$$

1 where

$$D_e(\omega) := m_e^{-2}[\omega\{1 + \cos(\omega m_r)\} + m_e^{-1}\sin(\omega m_r)]^2 - 4\{m_e^{-1}\sin(\omega m_r) + \omega\}\omega(\omega^2 + m_e^{-2}).$$

2 If we plug (S8) into (S5) we get

$$\Lambda = \Lambda_e^*(\omega) := \frac{\{m_e^{-1} + m_i^*(\omega)^{-1}\}\omega^2}{m_e^{-1}m_i^*(\omega)^{-1}\{1 - \cos(\omega m_r)\} - \omega^2}.$$

3 Finally using the relation

$$\Lambda = \frac{\beta m_i - 1}{m_i + m_e + m_r} = \frac{R_0 - 1}{m_i + m_e + m_r},$$

4 we get a parametric expression for  $R_0$  as

$$R_0 = 1 + \Lambda_e^*(\omega)\{m_i^*(\omega) + m_e + m_r\}. \quad (\text{S9})$$

5 Fixing  $m_e$  and  $m_r$ , we use expressions (S8) and (S9), in the  $(m_i, R_0)$  parameter plane,  
 6 to plot the parameter set, where the characteristic equation (S3) has purely imaginary  
 7 roots (Figure S1 (a)). We numerically checked stability of the endemic equilibrium as  
 8 depicted in Figure S1 (a). Indeed if two parameters  $(m_i, R_0)$  cross the plotted line from  
 9 below to above, Hopf bifurcation is expected as purely imaginary roots  $\pm i\omega$  move to  
 10 the right half complex plane. Elaboration of the analysis will be presented elsewhere.

11 To work in the  $(m_e, R_0)$ -parameter plane, we can repeat the same procedure, fixing  $m_i$   
 12 and  $m_r$ . Since (S6) is a symmetric polynomial for  $m_e$  and  $m_i$ , one can solve (S6) as

$$m_e = m_e^*(\omega) := \frac{-m_i^{-1}[\omega\{1 + \cos(\omega m_r)\} + m_i^{-1}\sin(\omega m_r)] \pm \sqrt{D_i(\omega)}}{2\omega(\omega^2 + m_i^{-2})}, \quad (\text{S10})$$

13 where

$$D_i(\omega) := m_i^{-2} \{ \omega \{ 1 + \cos(\omega m_r) \} + m_i^{-1} \sin(\omega m_r) \}^2 - 4 \{ m_i^{-1} \sin(\omega m_r) + \omega \} \omega (\omega^2 + m_i^{-2}).$$

1 Then from (S5) one obtains

$$\Lambda = \Lambda_i^*(\omega) := \frac{\{m_e^*(\omega)^{-1} + m_i^{-1}\}\omega^2}{m_e^*(\omega)^{-1}m_i^{-1}\{1 - \cos(\omega m_r)\} - \omega^2}.$$

2 We thus get a parametric expression for  $R_0$  as

$$R_0 = 1 + \Lambda_i^*(\omega) \{ m_i^*(\omega) + m_e + m_r \}. \tag{S11}$$

3 Similarly we can plot a parametric curve given by (S10) and (S11) in the  $(m_e, R_0)$ -  
4 parameter plane, see Figure S1 (b).

5

## 6 Reference

- 7 1. O. Diekmann, S.A. van Gils, S.M.V. Lunel, H.O. Walther, Delay Equations  
8 Functional, Complex and Nonlinear Analysis, Springer Verlag (1991).

9
